# Supplementary material for: Effects of nettle slurry ( Urtica dioica L.) used as foliar fertilizer on potato ( Solanum tuberosum L.) yield and plant growth
Source: PeerJ journal article supplement (doi:10.7717/peerj.4729), 2018-05-07

## Effect of sampler

The analysis of variance for the effect of Sampler on yield shows NO significant differences among treatments ( $p = 0.76972$ ,  $R^2 = 0.02429$ ).

Table 1: Table 0: Summary of the mean yields achieved by each sampler (Kg/m) with the Analysis of variance values and post-hoc Tukey test. In Treatments RD, recommended dosage; N, number of repetitions; HSD, post-hoc Tukey test Honestly Significant Difference; Sd, standard deviation; Se, standard error; standardized Skewness & Kurtosis; DF, degrees of freedom

| Tr   | N  | mean   | HSD | sd      | se      | skew     | kurtosis | Shapiro |
|------|----|--------|-----|---------|---------|----------|----------|---------|
| YieA | 36 | 2.4628 | a   | 0.58261 | 0.09710 | 0.53892  | -0.44914 | 0.15739 |
| YieB | 36 | 2.1369 | a   | 0.75080 | 0.12513 | 0.32754  | 0.34508  | 0.83200 |
| YieC | 36 | 2.1256 | a   | 0.62446 | 0.10408 | -0.52254 | 0.96815  | 0.40973 |

|           | Df  | Sum Sq  | Mean Sq | F value | Pr(>F)  | HSD               | eta.sq  |
|-----------|-----|---------|---------|---------|---------|-------------------|---------|
| YSampler  | 2   | 2.6402  | 1.32010 | 3.0627  | 0.05096 | 0.367891618581786 | 0.05512 |
| Residuals | 105 | 45.2580 | 0.43103 | NA      | NA      |                   | NA      |

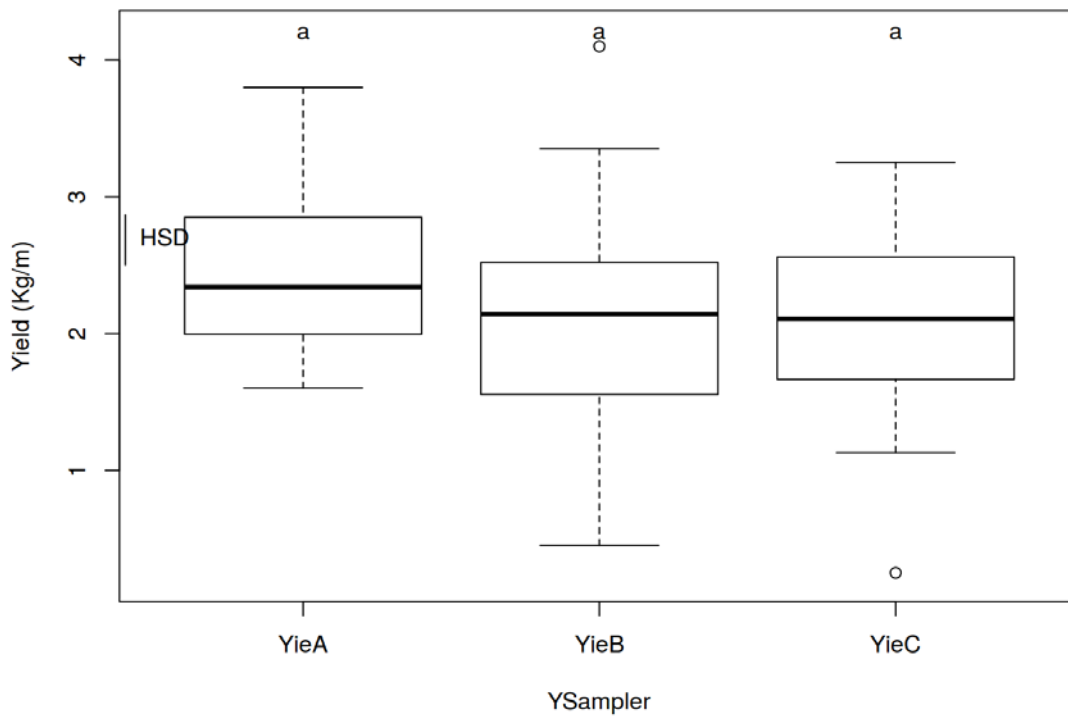

Supplement: Fig_S2.pdf [file Fig_S2.pdf]
