# Supplementary material for: Effects of nettle slurry (Urtica dioica L.) used as foliar fertilizer on potato (Solanum tuberosum L.) yield and plant growth
Source: PeerJ. 2018 May 7;6:e4729. doi: 10.7717/peerj.4729 (PMC5944444; doi:10.7717/peerj.4729)
Supplement: Supplemental Information 4 [file peerj-06-4729-s004.xlsx]

## Sheet: Hoja1
Entire data joint (1 data per plot)
Block pair	1-2						3-4						5-6						P-values
Block pair	a						a						b						0.0003
Treatments by block pair	a	a	a	a	a	a	a	a	a	a	a	a	a	a	a	a	a	a	0.9182	0.4614	0.752
Block pair by treatments	a	a	a	a	a	a	a	ab	b	a	a	a	a	a	a	a	b	c	0.5982	0.3032	0.0909	0.2097	0.6275	0.003
Treatments	a			a			a			a			a			a			0.8127
Treatments	A			B			C			D			E			F
Entire data not joint (3 measures per plot)
Block pair	1-2						3-4						5-6						P-values
Block pair	a						a						b						0.0004
Treatments by block pair	a	a	a	a	a	a	a	a	a	a	a	a	a	a	a	a	a	a	0.8436	0.5581	0.8543
Block pair by treatments	a	a	a	a	a	b	a	a	a	a	ab	b	a	a	a	a	a	a	0.4439	0.0324	0.1956	0.0698	0.4998	0.2934
Treatments	a			a			a			a			a			a			0.7697
Treatments	A			B			C			D			E			F
With residuals (3 measures per plot)
Block pair	1-2						3-4						5-6						P-values
Block pair	a						a						a						1
Treatments by block pair	a	a	a	a	a	a	a	a	a	a	a	a	a	a	a	a	a	a	0.8436	0.5581	0.8543
Block pair by treatments	a	a	a	a	a	a	a	a	a	a	a	a	a	a	a	a	a	a	0.3385	0.5915	0.9894	0.7923	0.9279	0.6732
	a			a			a			a			a			a			0.7065
Treatments	A			B			C			D			E			F
